# Supplementary material for: Testing Phylogeographic Hypotheses in Mepraia (Hemiptera: Reduviidae) Suggests a Complex Spatio-Temporal Colonization in the Coastal Atacama Desert
Source: MDPI journal article supplement (doi:10.3390/insects13050419), 2022-04-29
Supplement: s1 [file s1]

**Table S1.** Sampling localities and accession numbers.

N: number of individuals sequenced. COIA: segment A of the cytochrome oxidase subunit I gene. COIB: segment B of the cytochrome oxidase subunit I gene. cyt b: cytochrome oxidase b gene segment. ND4: NADH dehydrogenase subunit 4 gene segment. Superscript letter in the accession number: <sup>a</sup> sequenced in [11], <sup>b</sup> sequenced in [7], <sup>c</sup> sequenced in [9]. Accession number without superscript indicates sequences obtained in this study. --- : segment not amplified.

| Locality                | Latitude/longitude       | N  | Taxa    | Species                   | GenBank accession number |                       |                       |          |
|-------------------------|--------------------------|----|---------|---------------------------|--------------------------|-----------------------|-----------------------|----------|
|                         |                          |    |         |                           | COIB                     | COIA                  | cyt b                 | ND4      |
| La Rioja                |                          |    | Out     | <i>T. eratyrusiformis</i> | MN117859 <sup>c</sup>    | GQ336898 <sup>a</sup> | KC236979 <sup>b</sup> | MZ348418 |
| Corazones               | 18°28'47" S/70°19'27" W  | 13 | C2      | <i>M. gajardoi</i>        | KC236913 <sup>b</sup>    | MZ348366              | KC236946 <sup>b</sup> | MZ348391 |
|                         |                          |    | C15     | <i>M. gajardoi</i>        | KC236914 <sup>b</sup>    | MZ348366              | KC236947 <sup>b</sup> | MZ348392 |
|                         |                          |    | C16     | <i>M. gajardoi</i>        | KC236915 <sup>b</sup>    | MZ348366              | KC236948 <sup>b</sup> | MZ348393 |
|                         |                          |    | C21     | <i>M. gajardoi</i>        | KC236916 <sup>b</sup>    | MZ348366              | KC236949 <sup>b</sup> | ---      |
|                         |                          |    | C37     | <i>M. gajardoi</i>        | KC236917 <sup>b</sup>    | MZ348366              | KC236950 <sup>b</sup> | MZ348391 |
| Caleta Vitor            | 18°45'45" S/ 70°20'34" W | 13 | V3      | <i>M. gajardoi</i>        | KC236918 <sup>b</sup>    | MZ348367              | KC236951 <sup>b</sup> | MZ348394 |
|                         |                          |    | V8      | <i>M. gajardoi</i>        | KC236919 <sup>b</sup>    | MZ348367              | KC236952 <sup>b</sup> | MZ348395 |
|                         |                          |    | V10     | <i>M. gajardoi</i>        | KC236920 <sup>b</sup>    | MZ348368              | KC236953 <sup>b</sup> | MZ348396 |
| Caleta Camarones        | 19°12'16" S/ 70°16'08" W | 13 | Ca3     | <i>M. gajardoi</i>        | KC236921 <sup>b</sup>    | MZ348369              | KC236954 <sup>b</sup> | MZ348397 |
|                         |                          |    | Ca5     | <i>M. gajardoi</i>        | KC236922 <sup>b</sup>    | MZ348369              | KC236955 <sup>b</sup> | MZ348396 |
| Río Seco                | 21°00'06" S/70°09'52" W  | 15 | RS1     | <i>M. gajardoi</i>        | KC236923 <sup>b</sup>    | MZ348370              | KC236956 <sup>b</sup> | ---      |
|                         |                          |    | RS12    | <i>M. gajardoi</i>        | KC236925 <sup>b</sup>    | MZ348371              | KC236958 <sup>b</sup> | ---      |
|                         |                          |    | RS34    | <i>M. gajardoi</i>        | KC236926 <sup>b</sup>    | MZ348371              | KC236959 <sup>b</sup> | ---      |
| Caleta San Marcos       | 21°06'56" S/70°07'30" W  | 11 | SM8     | <i>M. gajardoi</i>        | KC236924 <sup>b</sup>    | MZ348371              | KC236957 <sup>b</sup> | ---      |
| Santa María Island      | 23°25'51" S/70°36'31" W  | 16 | ISMa1   | <i>M. sp</i>              | MN117861 <sup>c</sup>    | MZ348372              | MN117875 <sup>c</sup> | MZ348398 |
|                         |                          |    | ISMa7   | <i>M. sp</i>              | MN117862 <sup>c</sup>    | MZ348372              | MN117876 <sup>c</sup> | MZ348399 |
| Santa María Continent   | 23°28'3" S/70°37'2" W    | 17 | COSMA1  | <i>M. sp</i>              | MN117863 <sup>c</sup>    | MZ348373              | MN117877 <sup>c</sup> | MZ348400 |
|                         |                          |    | COSMA7  | <i>M. sp</i>              | MN117864 <sup>c</sup>    | MZ348373              | MN117878 <sup>c</sup> | MZ348401 |
| Médano                  | 24°36'51" S/70°33'31" W  | 11 | Me34    | <i>M. parapatrica</i>     | KC236928 <sup>b</sup>    | ---                   | KC236961 <sup>b</sup> | MZ348405 |
| Pan de Azúcar Island    | 26°10'27" S/70°39'58" W  | 26 | IPA1    | <i>M. parapatrica</i>     | MN117865 <sup>c</sup>    | MZ348374              | MN117879 <sup>c</sup> | MZ348402 |
|                         |                          |    | IPA2    | <i>M. parapatrica</i>     | MN117866 <sup>c</sup>    | ---                   | MN117880 <sup>c</sup> | MZ348403 |
|                         |                          |    | IPA16   | <i>M. parapatrica</i>     | MN117867 <sup>c</sup>    | MZ348375              | MN117881 <sup>c</sup> | MZ348402 |
|                         |                          |    | IPA20   | <i>M. parapatrica</i>     | MN117868 <sup>c</sup>    | MZ348376              | MN117882 <sup>c</sup> | MZ348403 |
|                         |                          |    | IPA36   | <i>M. parapatrica</i>     | MN117869 <sup>c</sup>    | MZ348376              | MN117883 <sup>c</sup> | MZ348402 |
| Pan de Azúcar Continent | 26° 8'34" S/ 70°40'10" W | 23 | COPA3S2 | <i>M. parapatrica</i>     | MN117870 <sup>c</sup>    | MZ348377              | MN117884 <sup>c</sup> | MZ348404 |
| Caleta Zenteno          | 26°51'08" S/70°48'36" W  | 16 | Z8      | <i>M. parapatrica</i>     | KC236929 <sup>b</sup>    | MZ348378              | KC236962 <sup>b</sup> | MZ348406 |

|                    |                          |    |         |                       |                       |          |                       |          |
|--------------------|--------------------------|----|---------|-----------------------|-----------------------|----------|-----------------------|----------|
|                    |                          |    | Z12     | <i>M. parapatrica</i> | KC236930 <sup>b</sup> | MZ348378 | KC236963 <sup>b</sup> | MZ348407 |
| Inca de Oro        | 26°48'15" S/69°57'14" W  | 9  | Inca1   | <i>M. spinolai</i>    | MN117871 <sup>c</sup> | ---      | MN117885 <sup>c</sup> | MZ348408 |
|                    |                          |    | Inca2   | <i>M. spinolai</i>    | MN117872 <sup>c</sup> | ---      | MN117886 <sup>c</sup> | MZ348408 |
|                    |                          |    | Inca11  | <i>M. spinolai</i>    | MN117873 <sup>c</sup> | ---      | MN117887 <sup>c</sup> | MZ348409 |
| Llanos de Challe   | 28°08'52" S/71°04'32" W  | 8  | Lla1    | <i>M. spinolai</i>    | KC236931 <sup>b</sup> | MZ348379 | KC236964 <sup>b</sup> | ---      |
|                    |                          |    | Lla3    | <i>M. spinolai</i>    | KC236932 <sup>b</sup> | MZ348379 | KC236965 <sup>b</sup> | ---      |
|                    |                          |    | Lla4    | <i>M. spinolai</i>    | KC236933 <sup>b</sup> | MZ348380 | KC236966 <sup>b</sup> | MZ348410 |
|                    |                          |    | Lla13   | <i>M. spinolai</i>    | KC236934 <sup>b</sup> | MZ348381 | KC236967 <sup>b</sup> | MZ348411 |
| Alto del Carmen    | 28°43'21" S/70°31'02" W  | 14 | AC2     | <i>M. spinolai</i>    | KC236935 <sup>b</sup> | MZ348382 | KC236968 <sup>b</sup> | MZ348412 |
|                    |                          |    | AC11    | <i>M. spinolai</i>    | KC236936 <sup>b</sup> | MZ348383 | KC236969 <sup>b</sup> | MZ348412 |
| Caleta Toro        | 30°44'30" S/71°42'05" W  | 14 | T1      | <i>M. spinolai</i>    | KC236937 <sup>b</sup> | MZ348384 | KC236970 <sup>b</sup> | MZ348414 |
| Monte Patria       | 30°51'16" S/70°41'51" W  | 14 | Mp1     | <i>M. spinolai</i>    | KC236939 <sup>b</sup> | ---      | KC236972 <sup>b</sup> | MZ348413 |
|                    |                          |    | Mp4     | <i>M. spinolai</i>    | KC236940 <sup>b</sup> | ---      | KC236973 <sup>b</sup> | MZ348413 |
| RN Las Chinchillas | 31°30'28" S/ 71°06'19" W | 11 | RNCh26  | <i>M. spinolai</i>    | KC236941 <sup>b</sup> | MZ348385 | KC236974 <sup>b</sup> | MZ348415 |
|                    |                          |    | RNCh176 | <i>M. spinolai</i>    | KC236942 <sup>b</sup> | MZ348386 | KC236975 <sup>b</sup> | MZ348415 |
|                    |                          |    | RNCh345 | <i>M. spinolai</i>    | KC236943 <sup>b</sup> | MZ348387 | KC236976 <sup>b</sup> | MZ348416 |
| San Felipe         | 32°51'24" S/70°29'13" W  | 4  | SF1     | <i>M. spinolai</i>    | MN117874 <sup>c</sup> | MZ348388 | MN117888 <sup>c</sup> | ---      |
| Til Til            | 33°06'19" S/70°55'53" W  | 11 | Til1    | <i>M. spinolai</i>    | KC236944 <sup>b</sup> | MZ348389 | KC236977 <sup>b</sup> | MZ348417 |
|                    |                          |    | Til32   | <i>M. spinolai</i>    | KC236945 <sup>b</sup> | MZ348390 | KC236978 <sup>b</sup> | MZ348417 |

**Table S2.** Historical and mutational parameters used in the coalescent simulations analysis.

| Parameter          | Prior distribution |                        |
|--------------------|--------------------|------------------------|
|                    | Type               | Initial-Final interval |
| Ne                 | Uniform            | 200,000 - 450,000      |
| t1                 | Uniform            | 1300000 - 1600000      |
| t2                 | Uniform            | 1700000 - 2100000      |
| t3                 | Uniform            | 2000000 - 2600000      |
| Mean mutation rate | Uniform            | 1.00E-8 - 5.00E-8      |
